1 ***Azotobacter vinelandii* scaffold protein NifU transfers iron to NifQ as part of the**  
2 **iron-molybdenum cofactor biosynthesis pathway for nitrogenase**

3  
4 Emma Barahona<sup>1</sup>, Xi Jiang<sup>1,3</sup>, Emilio Jiménez-Vicente<sup>2</sup>, Luis M. Rubio<sup>1,3\*</sup>, Manuel  
5 González-Guerrero<sup>1,3\*</sup>  
6

7 <sup>1</sup> Centro de Biotecnología y Genómica de Plantas, Universidad Politécnica de Madrid,  
8 Instituto Nacional de Investigación y Tecnología Agraria y Alimentaria, Pozuelo de  
9 Alarcón, 28223 Madrid, Spain

10 <sup>2</sup> Department of Biochemistry, Virginia Polytechnic Institute, Blacksburg, VA24061,  
11 USA

12 <sup>3</sup> Departamento de Biotecnología-Biología Vegetal, Escuela Técnica Superior de  
13 Ingeniería Agronómica, Alimentaria y de Biosistemas, Universidad Politécnica de  
14 Madrid, 28040 Madrid, Spain.  
15

16 Running Title: NifU transfers Fe-S clusters to NifQ  
17

18 \* To whom correspondence should be addressed:

19 Manuel González-Guerrero, Centro de Biotecnología y Genómica de Plantas  
20 (UPM-INIA), Campus de Montegancedo UPM, Crta M-40 km 38. 28223 Pozuelo de  
21 Alarcón, Madrid, Spain. [manuel.gonzalez@upm.es](mailto:manuel.gonzalez@upm.es). Phone +34 91 067 9190.

22 Luis M. Rubio, Centro de Biotecnología y Genómica de Plantas (UPM-INIA),  
23 Campus de Montegancedo UPM, Crta M-40 km 38. 28223 Pozuelo de Alarcón, Madrid,  
24 Spain. [lm.rubio@upm.es](mailto:lm.rubio@upm.es). Phone +34 91 067 9189.  
25  
26

27 Keywords: iron; iron-sulfur protein; molybdenum; nitrogen fixation; nitrogenase  
28  
29  
30  
31  
32  
33  
34

35 **ABSTRACT**

36 *Azotobacter vinelandii* molybdenum-dependent nitrogenase obtains molybdenum  
37 from NifQ, a monomeric iron-sulfur molybdoprotein. This protein requires of a  
38 preexisting [Fe-S] cluster to form a [MoFe<sub>3</sub>S<sub>4</sub>] group to serve as specific donor during  
39 nitrogenase cofactor biosynthesis. Here, we show biochemical evidence for NifU being  
40 the donor of the [Fe-S] cluster. Protein-protein interaction studies using apo-NifQ and as-  
41 isolated NifU demonstrated the interaction between both proteins which is only effective  
42 when NifQ is unoccupied by its [Fe-S] cluster. The apo-NifQ iron content increased after  
43 the incubation with as-isolated NifU, reaching similar levels to holo-NifQ after the  
44 interaction between apo-NifQ and NifU with reconstituted transient [Fe<sub>4</sub>-S<sub>4</sub>] groups.  
45 These results also indicate the necessity of co-expressing NifU together with NifQ in the  
46 pathway to provide molybdenum for the biosynthesis of nitrogenase in engineered  
47 nitrogen-fixing plants.

48  
49  
50  
51  
52  
53  
54  
55  
56  
57  
58  
59  
60  
61  
62  
63  
64  
65  
66  
67  
68

## 69 Introduction

70 Nitrogenases catalyses the reduction of N<sub>2</sub> into NH<sub>3</sub> in a energetically expensive  
71 process (1). These enzymes, only present in some bacteria and archaea, are two-  
72 component oligomeric metalloprotein complexes made up of a dinitrogenase (component  
73 I) and a dinitrogenase reductase (component II) (2). Component I of molybdo-  
74 nitrogenases, the most common ones, is a heterotetramer formed by two NifD, two NifK  
75 proteins and two different metalloclusters. The iron-molybdenum cofactor (FeMo-co;  
76 [Fe<sub>7</sub>-S<sub>9</sub>-C-Mo-*R*-homocitrate]) is present at the active site of each NifD subunit, while  
77 the [Fe<sub>8</sub>-S<sub>7</sub>] P-cluster is at the interface of each NifD and NifK subunits (3, 4).  
78 Component II is a homodimer encoded by *nifH*. This protein contains a single [Fe<sub>4</sub>-S<sub>4</sub>]  
79 cluster bridging the two identical subunits and two sites for Mg<sup>2+</sup>-ATP binding and  
80 hydrolysis (1). Electrons provided to NifH are transferred from its [Fe<sub>4</sub>-S<sub>4</sub>] cluster  
81 through the P-cluster of NifDK to FeMo-co, where N<sub>2</sub> is reduced (5, 6). Therefore, for  
82 nitrogenase to function, these metal cofactors must be assembled, protected from oxygen,  
83 and transferred to the apo-enzymes, a tightly-regulated process that requires several  
84 additional proteins (5). Among them, NifU and NifQ are the known points from where  
85 iron and molybdenum are specifically directed towards nitrogenase cofactor assembly  
86 (5).

87 NifU is a 33 kDa homodimer with a permanent [Fe<sub>2</sub>-S<sub>2</sub>] cluster per subunit (7). It  
88 is able to bind iron to synthesize [Fe<sub>4</sub>-S<sub>4</sub>] groups, using the sulfur provided by NifS, a 43  
89 kDa cysteine desulfurase (8, 9). These groups are transiently assembled in N- and C-  
90 terminal domains, and are subsequently transferred to apo-NifH, activating it (10). NifU  
91 is also involved in FeMo-co biosynthesis, providing the substrate [Fe<sub>4</sub>-S<sub>4</sub>] clusters  
92 required for NifB-co assembly by NifB (11). These data indicate a pivotal role of NifU  
93 in [Fe-S] assembly and transfer to the different enzymes involved in nitrogenase  
94 maturation and cofactor assembly.

95 Molybdenum destined for FeMo-co assembly is typically provided by NifQ.  
96 *Azotobacter vinelandii* and *Klebsiella pneumoniae nifQ* mutant strains are impaired in  
97 nitrogen fixation unless molybdate levels are dramatically increased in the growth  
98 medium (12, 13). NifQ is a 22 kDa monomeric [Fe-S] molybdoprotein that may contain  
99 three to four iron and up to one molybdenum atoms per molecule (14). This protein is  
100 found in all diazotrophic species of Proteobacteria (excepting some *Rhizobia*) (15).  
101 Although the mechanism is yet-unknown, it has been shown that NifQ synthesizes a [Mo-  
102 Fe<sub>3</sub>-S<sub>4</sub>]<sup>3+</sup> group using a [Fe<sub>3</sub>-S<sub>4</sub>]<sup>+</sup> precursor (16). Subsequently, this Mo-Fe-cluster will be

103 transferred to a NifEN/NifH complex for molybdenum integration into FeMo-co (14).

104 Currently, the source of the [Fe-S] cluster precursor of NifQ is unknown.  
105 Considering the central position of NifU as the scaffold in which [Fe-S] clusters are first  
106 assembled for some nitrogenase components (10, 11), it can be hypothesized that it is also  
107 the source of the NifQ clusters. Supporting this role, here we report that NifU transfers a  
108 [Fe<sub>4</sub>-S<sub>4</sub>] cluster to NifQ through direct protein-protein interaction.

109

## 110 **Results**

### 111 *NifU and NifS co-elute with NifQ*

112 To determine whether NifQ can interact with the [Fe-S] cluster biosynthesis  
113 branch of the nitrogenase assembly pathway, an N-terminal Strep-tagged *A. vinelandii*  
114 NifQ (sNifQ) was expressed in an *Escherichia coli* strain that already produced *A.*  
115 *vinelandii* NifU and NifS proteins. After induction and cell lysis, sNifQ was purified  
116 under anaerobic conditions. As expected, sNifQ was the most abundant protein in the  
117 eluted fractions of the StrepTactin Affinity Chromatography (STAC) chromatography, as  
118 evidenced by the Coomassie blue staining of SDS-gels as well as the immunodetection  
119 of NifQ with specific antibodies (Fig. 1). To determine whether NifU and NifS were  
120 among these additional bands, specific antibodies raised against either protein were used  
121 for immunoblotting. As shown in Figure 1, both proteins co-eluted with NifQ. These were  
122 not the result of unspecific interaction of NifU and/or NifS with the purification resin,  
123 since both proteins were not detected in the elution fractions when NifQ was not  
124 expressed in this *E. coli* strain (Fig. S1).

125

### 126 *The interaction between NifQ and NifU is NifS independent and apo-NifQ dependent.*

127 The co-purification of NifU and NifS with NifQ from *E. coli* crude extracts could  
128 be the consequence of direct interactions among these three proteins, or in combination  
129 with endogenous proteins. To discriminate between these two possibilities, apo-NifQ was  
130 purified using a (His)<sub>6</sub> tag (apo-NifQ<sub>H</sub>). This apo-form had less than 1 iron atom per  
131 monomer (Table 1). The “*as purified*” (AS) NifU<sub>S</sub> contained 2.4 iron atoms per monomer  
132 (Table 1), a mix of the permanent [Fe<sub>2</sub>-S<sub>2</sub>] cluster and the transient ones. Apo-NifQ<sub>H</sub>, AS-  
133 NifU<sub>S</sub> and sNifS were incubated together for 5 minutes under anaerobic conditions and  
134 loaded onto Ni-NTA column. As shown in Figure 2, apo-NifQ<sub>H</sub> was properly captured  
135 by the resin and the protein eluted at 150 mM imidazole. Most soluble AS-NifU<sub>S</sub> was  
136 detected in the flowthrough and early wash fractions, but a significant amount co-eluted

137 with apo-NifQ<sub>H</sub>. AS-NifU<sub>S</sub> presence in the elution fractions was due to apo-NifQ<sub>H</sub>; when  
138 NifQ was not present, no NifU was detected in the eluates (Fig. S2). These results confirm  
139 the apo-NifQ/AS-NifU interaction without additional proteins being required. On the  
140 contrary, sNifS was only detected in the flowthrough and initial wash fractions (Fig. 2),  
141 suggesting that NifS was not necessary for the apo-NifQ/AS-NifU interaction.

142 Considering that the metalation state of NifQ might influence the interaction with  
143 NifU, co-purification assays were carried out between sNifQ in its holo-state and a N-  
144 terminal (His)<sub>6</sub>-tagged NifU (AS-HNifU). Holo-sNifQ had 2.8 iron atoms per monomer  
145 and AS-HNifU had 2.7 (Table 1). In contrast to what was observed using apo-sNifQ, no  
146 interaction with NifU was observed (Fig. 3). This data suggests that when NifQ is already  
147 occupied by an [Fe-S] cluster the interaction with NifU is much reduced.

148

#### 149 ***The iron content of NifQ increases after the interaction with NifU***

150 The fact that the interaction between NifQ and NifU is contingent upon the iron  
151 content of NifQ is indicative of a process in which iron would be transferred from NifU.  
152 This possibility was tested by determining the iron transfer from one protein to the other.  
153 Apo-NifQ<sub>H</sub> was incubated with either AS-NifU<sub>S</sub> or with a reconstituted (R) NifU<sub>S</sub> that  
154 contained a higher complement of transient [Fe<sub>4</sub>S<sub>4</sub>] clusters, as indicated by a 5.8  
155 iron:monomer ratio (Table 1). These proteins were incubated for 5 min to allow for metal  
156 transfer. The interaction with R-NifU<sub>S</sub> did not seem to be more stable than with AS-  
157 NifU<sub>S</sub>, since similar amounts of proteins were observed in the elutions with NifQ (Fig.  
158 4A, B). In these interactions, 85% of the total protein in the elution fractions corresponded  
159 to NifQ, and in the flowthrough an even larger amount to NifU was observed. Taken these  
160 proportions into consideration and measuring the iron content in the flowthrough and  
161 elution fractions, the iron:protein ratios could be determined. As shown in Figure 4C,  
162 incubation with NifU<sub>S</sub> significantly increased the iron content in NifQ<sub>H</sub> to around 2:1  
163 molar ration when partnered with R-NifU<sub>S</sub>, and 1.5:1 with AS-NifU<sub>S</sub>. Similar results were  
164 observed when the interaction was carried out for 120 min, which led to close-to-  
165 saturation iron levels in NifQ<sub>H</sub> when combined with R-NifU<sub>S</sub> (Fig. S3).

166 Iron binding to apo-NifQ could be due to sequestering the iron that may dissociate  
167 from NifU, instead of being the consequence of direct protein-protein transfer. If this  
168 were the case, separating the two proteins with a membrane that only allowed for iron  
169 diffusion but prevented the passage of the proteins, should still result in iron binding to  
170 apo-NifQ. However, when this control was carried out, using R-NifU<sub>S</sub> or AS-NifU<sub>S</sub>, no

171 iron was detected in the compartment containing apo-NifQ<sub>H</sub> even when 120 min was  
172 allowed for iron to dissociate and diffuse (Fig. 5).

173

#### 174 ***Changes in the UV-visible absorption spectrum of NifQ upon interaction with NifU***

175 The presence of [Fe-S] clusters in a protein affects its UV-visible signature. Both  
176 R-NifU<sub>S</sub> and AS-NifU<sub>S</sub> presented UV-vis absorption spectra characteristic of carrying O<sub>2</sub>-  
177 sensitive [Fe-S] cluster, with a peak around 330 nm and another around 420 nm (Fig. 6A).  
178 These peaks were not observed in apo-NifQ<sub>H</sub> UV-vis absorption spectra, indicating the  
179 absence of any [Fe-S] cluster. Fractions obtained after the apo-NifQ<sub>H</sub>/R-NifU<sub>S</sub> interaction  
180 were analyzed to determine their UV-vis absorption spectra. As shown in Figure 6B, the  
181 absorption spectra from the elution fraction, where more than 85% of the total proteins  
182 corresponded to NifQ<sub>H</sub>, presented the typical shoulder around 400 nm related to [Fe<sub>4</sub>-S<sub>4</sub>]  
183 cluster (8).

184

#### 185 **Discussion**

186 [Fe-S] proteins are present in all three domains of life, participating in a wide array  
187 of physiological processes that include DNA metabolism, energy transduction, or  
188 metabolic pathways (17). It has been estimated that 1-5 % of bacterial proteins contain  
189 some [Fe-S] cluster (18). All these groups can be made *in vitro* by simply providing iron  
190 and sulfur, while *in vivo* they are synthesized over protein scaffolds in a process requiring  
191 multiple enzymes (17). The importance of these scaffold proteins is evidenced by their  
192 essential nature for cell metabolism and their specialization for different metabolic  
193 processes. Furthermore, to date there is no known *de novo* synthesis of [Fe-S] groups  
194 directly in target apo-proteins. Consequently, a “bucket-brigade” of proteins direct the  
195 newly produced [Fe-S] clusters to the acceptor proteins (5, 17, 19). In this context, it is  
196 worth noting that the model diazotroph *A. vinelandii* uses NifU as the primary scaffold  
197 for [Fe-S] synthesis and transfer to nitrogenase components (7, 10).

198 Molybdate use for FeMo-co synthesis *via* NifQ requires of a pre-existing [Fe<sub>3</sub>-  
199 S<sub>4</sub>]<sup>+</sup> group (14, 16). NifU and NifQ interaction when heterologously produced in *E. coli*,  
200 or when they are purified and combined under *in vitro*, conditions suggest that NifU could  
201 be the source of the [Fe<sub>4</sub>-S<sub>4</sub>] precursor. This is further supported by the increased iron  
202 content in NifQ when incubated with NifU, as well as by the spectroscopic signature of  
203 the repurified NifU-interacting NifQ which presents the absorbance pattern of [Fe<sub>4</sub>-S<sub>4</sub>]  
204 groups, characterized by a pronounced shoulder around 400 nm (8). The [Fe<sub>4</sub>-S<sub>4</sub>] cluster

205 would then have to lose one iron, to create the  $[\text{Fe}_3\text{-S}_4]^+$  group required for molybdate to  
206 form the  $[\text{Mo-Fe}_3\text{-S}_4]$  prior to molybdenum transfer to the NifEN/NifH complex (14). It  
207 is to be expected that additional proteins will establish complexes with NifQ to mediate  
208 molybdate transfer and inclusion into the cluster.

209 Functional interaction between two proteins can sometimes evolve into one single  
210 protein with two different domains, each one of them corresponding to one of the original  
211 enzymes. This is advantageous to channel the product of one enzyme to the next, reducing  
212 diffusion times, increasing local substrate concentrations, and improving kinetics overall  
213 (20). *A. vinelandii* NifU is an example of this domain evolution since it combines an N-  
214 terminal IscU scaffold motive, a central ferredoxin fold, and a C-terminal NfuA-like  
215 domain (7). Another protein essential for nitrogenase maturation, NifB can also be found  
216 as standalone radical *S*-adenosylmethionine (SAM) domain that then interacts with the  
217 NifB-cofactor carrier NifX, or as combination of both proteins in a single polypeptide  
218 (21). Consistent with an adaptation to optimize protein-protein interactions, some delta-  
219 proteobacteria (such as *Geoalkalibacter ferrihydricus* or *Malonomonas rubra*) contain  
220 NifQ as the C-terminal domain of a larger protein that also includes an N-terminal domain  
221 with high homology to IscU/NifU proteins. Interestingly, the additional domain only  
222 shares homology with the N-terminal region of *A. vinelandii* NifU, what could indicate  
223 that the  $[\text{Fe}_4\text{-S}_4]$  clusters transferred to NifQ would mainly be synthesized in N-terminal  
224 NifU.

225 The interaction between two proteins exchanging substrates must be a relatively  
226 fast and labile process for it to work at optimal conditions and limit the subset of proteins  
227 and substrates lost in unproductive interactions. For instance,  $\text{Cu}^+$ -chaperone CopZ  
228 rapidly dissociates from  $\text{Cu}^+$ -transporting ATPase CopA after transferring  $\text{Cu}^+$  to prevent  
229 the apo-chaperone blocking the transfer site (22, 23). NifQ-NifU interaction is similarly  
230 conditional to the metalation state of NifQ. When NifQ already contains an  $[\text{Fe-S}]$  cluster  
231 -the holo-NifQ used in this study- the interaction with NifU does not occur or is severely  
232 weakened.

233 Beyond the specific metalation of NifQ, its interaction with NifU and the likely  
234 dependency on NifU activity signals the position in which iron and molybdenum  
235 metabolism for biological nitrogen fixation are coordinated. Only when sufficient iron is  
236 allocated for NifU, molybdenum might be used for NifQ. This co-regulation of both  
237 elements is also present in other molybdenum-dependent reactions, such as the synthesis  
238 of the molybdenum-cofactor (24).



239 In summary, these data indicate that NifU transfers [Fe<sub>4</sub>-S<sub>4</sub>] to all three major sets  
240 of [Fe-S] proteins in biological nitrogen fixation: NifH, NifB, and now also NifQ. This  
241 information is relevant as nitrogenase elements are being introduced and expressed in  
242 plants towards developing nitrogen-fixing crops. Co-expression with NifU has already  
243 shown to be essential for NifH activity when purified from plant chloroplasts (25), as well  
244 as for NifB obtained from yeast mitochondria (26). Therefore, it should be expected that  
245 similar co-expression with NifU would be needed for a functional NifQ-mediated  
246 molybdenum delivery pathway to nitrogenase in plants.

247

## 248 **Experimental Procedures**

### 249 ***Escherichia coli* strains and plasmids**

250 *E. coli* strain BL21 (DE3) was used to express the proteins used in this study. The  
251 plasmid pN2LP30 was used to produce untagged NifU and NifS in *E. coli*. This plasmid  
252 was obtained by amplifying the *A. vinelandii nifUS* genes with primers 2495 and 2496  
253 (Table S1) and using ELIC cloning (27) to introduce them in the *NcoI/NotI* digested  
254 pRSFiscmetKDuet-1 plasmid. To generate a NifQ<sub>H</sub> expressing vector, the primers 1184  
255 and 1185 (Table S1) were used to amplify the *nifQ* sequence from the *A. vinelandii*  
256 genomic DNA. The resulting amplicon was digested with *PstI* and *NotI* and cloned into  
257 previously *PstI/NotI*-digested pTrec99A. To produce <sub>s</sub>NifQ, the amplicon obtained from  
258 *A. vinelandii* genomic DNA using the primers NifQ-5' and NifQ-3' (Table S1) was  
259 digested with *NdeI* and *BamHI* and cloned in a similarly digested pT7-7 vector. Strep-tag  
260 was added to this vector by ligating at the *NdeI* site the overlapping oligonucleotides  
261 *NdeI*-Strep-tag-5' and *NdeI*-Strep-tag-3' (Table S1). The same procedure was used to  
262 fuse the Strep-tag to *nifS*-expressing vector pDB21223 (9). <sub>H</sub>NifU was obtained from  
263 cells transformed with plasmid pRHB609 (28). To produce NifU<sub>S</sub>, a 174 DNA fragment  
264 containing the last 99 nucleotides of *NifU* fused to the Strep-tag was synthesized  
265 (Integrated DNA Technologies, Coralville, IA), digested with *SacI* and *BamHI*, and  
266 ligated in similarly digested *NifU*-encoding plasmid pDB525 (7).

267

### 268 **Culture conditions for Nif protein expression in *E. coli***

269 In general, gene expression was induced with 1 mM isopropyl β-D-  
270 thiogalactoside (IPTG) in cells growing in LB media supplemented with 100 μg/ml  
271 ampicillin at OD<sub>600</sub> ≈ 0.6. After 3 h of induction at 37°C, cells were collected by  
272 centrifugation at 4,000 x g for 10 minutes. Cells producing NifU<sub>S</sub> were grown in LB



273 media supplemented with 100 µg/ml ampicillin, with 0.2 mM ferric ammonium citrate  
274 and 2 mM L-cysteine. Induction was done at  $OD_{600} \approx 0.6$  with 0.5 mM IPTG for 5-6 hours  
275 at 37°C.  $H_{\text{NifU}}$  induction was performed at  $OD_{600} \approx 0.7$  with 1 mM IPTG and 0.1 mg/l  
276  $Fe(NH_4)_2(SO_4)_2$  for 14 hours at 18 °C and 150 rpm.

277

### 278 ***Protein purification***

279 Strep-tagged proteins were purified by Strep-Tactin XT affinity chromatography  
280 (SATC). Approximately 15-20 g of recombinant *E. coli* BL21(DE3) cells were  
281 resuspended for 30 minutes in 80 ml of lysis buffer A containing 50 mM Tris-HCl pH  
282 8.0, 100 mM NaCl and 10% glycerol, 1 mM phenylmethylsulfonyl fluoride (PMSF).  
283 Cells were lysed in a French Press cell at 1,500 lb per square inch. The cell-free extract  
284 (CFE) was obtained after removing cell debris by centrifugation at 63,000 x g for 1 hour  
285 at 4°C and filtration with 0.45 µm pore size syringe filters (Sartorius). CFE was loaded  
286 onto a 1 ml Gravity flow Streptactin-XT high-capacity column (IBA Lifesciences),  
287 previously equilibrated with buffer A. The column was then washed 5 times with 2  
288 column volumes (CV) of buffer A per wash. Bound protein was eluted in three steps with  
289 1, 4 and 2 CV of buffer A containing 50 mM biotin per step.

290 His-tagged proteins were purified by Ni-NTA affinity chromatography.  
291 Approximately 20-25 g of recombinant *E. coli* BL21(DE3) cells were resuspended for 30  
292 minutes in 100 ml of lysis buffer W 100 mM Tris-HCl pH 8.0, 150 mM NaCl and 10%  
293 glycerol, 1 mM PMSF. Cells were lysed and CFE was obtained as described above. CFE  
294 was loaded onto a 2-ml Ni-NTA Agarose column (Qiagen) equilibrated with buffer W  
295 supplemented with 5 mM imidazole. Column was washed 6 times with 1 CV of buffer W  
296 with 5 mM imidazole and 6 times with 1 CV of buffer W with 20 mM imidazole per  
297 wash. Protein was eluted buffer W containing 150- and 300-mM imidazole.

298 Apo-NifQ purifications that were carried out in aerobic conditions to promote  
299 losing any bound iron. All other proteins were purified under anaerobic conditions (< 5.0  
300 ppm  $O_2$ ) inside a glovebox (COY Laboratories) using buffers previously made anaerobic  
301 by sparging with  $N_2$  overnight. Purification fractions were analyzed by electrophoresis.

302 Elution fractions were concentrated with 10-kDa cut-off pore size centrifugal  
303 membrane devices (Amicon Ultra-15, Millipore). Centrifugation procedure was  
304 performed at 4,000 x g for 45 min and this step was repeated until estimated biotin or  
305 imidazole concentration was lower than 50 nM and 500 nM, respectively. Protein  
306 concentration was determined by the bicinchoninic acid method (Pierce) with bovine

307 serum albumin as the standard (29). For iron determination, the rapid colorimetric micro-  
308 method for the quantitation of complexed iron in biological samples was performed (30).  
309 Purified proteins were frozen and stored in liquid N<sub>2</sub>.

310

### 311 ***In vitro [Fe-S] cluster reconstitution of NifU***

312 Strep-tagged NifU purified from *E. coli* was reconstituted *in vitro* as described  
313 (31) with slight modifications. 20 μM of NifU dimer was prepared in 100 mM MOPS  
314 (pH 7.5) buffer containing 8 mM 1,4-dithiothreitol (DTT) and incubated at 37 °C for 30  
315 min. To this mixture, 1 mM L-cysteine, 1 mM DTT, 225 nM NifS and 0.3 mM  
316 (NH<sub>4</sub>)<sub>2</sub>Fe(SO<sub>4</sub>)<sub>2</sub> were added. Iron additions were divided in three steps of 15 min each  
317 until reaching the final concentration of 0.3 mM. The reconstitution mixture was kept in  
318 ice for 3 h and then desalted using 10-kDa cutoff pore size centrifugal membrane devices  
319 (Amicon, Millipore) to remove excess reagents. R-NifU protein was stored in liquid  
320 nitrogen until use.

321

### 322 ***Protein-protein interaction assays***

323 Interaction assays were carried out for 5 min unless otherwise stated using 10  
324 nmol of each protein in a glovebox (COY Laboratories) under anaerobic conditions.  
325 Those involving apo-sNifQ took place in Buffer A. sNifQ and its interacting proteins  
326 were recovered passing the solution through a 200 μl Gravity flow Streptactin-XT column  
327 (IBA Lifesciences), previously equilibrated with anaerobic buffer A. Column was washed  
328 5 times with 2 CV of buffer A. The elution of target proteins from the resin was carried  
329 out by applying 0.5 CV, 1.4 CV and 0.8 CV of 2.5 mM desthiobiotin in Buffer A. When  
330 using NifQ<sub>H</sub> as bait, the interaction was carried out in Buffer W. Proteins were separated  
331 using a 200 μl Ni-NTA agarose column equilibrated with anaerobic 5 mM imidazole in  
332 buffer W. The column was washed 6 times with 2 CV of 5 mM imidazole in buffer W  
333 and 6 times with 2 CV of 20 mM imidazole in buffer W per wash. Elution was performed  
334 with 150 mM imidazole in buffer W.

335 To assess the interaction between holo-sNifQ and AS<sub>H</sub>NifU, 10 nmol of holo-  
336 sNifQ were immobilized on a 200 μl Gravity flow Streptactin-XT column, previously  
337 equilibrated with anaerobic buffer A. Column was washed twice with 2 CV of buffer A  
338 and 10 nmol of AS<sub>H</sub>NifU were loaded onto the holo-sNifQ-charged column. This column  
339 was washed 3 times with 3 CV of buffer and eluted with 50 mM biotin in buffer A.

340 To test the diffusion of iron, 50 nmol of apo-NifQ<sub>H</sub> and 50 nmol of R-NifU<sub>S</sub> were  
341 incubated for 5 and 120 min inside an anaerobic glovebox (COY Laboratories), separated  
342 by inserting a 2-kDa pore-size cutoff dialysis membrane, previously equilibrated for 1 h  
343 with buffer W. Controls with only apo-NifQ<sub>H</sub> on R-NifU<sub>S</sub>, AS-NifU<sub>S</sub> on the other side of  
344 the membrane were carried out at the same time. At the indicated times, samples from  
345 both membrane sides were collected to determine the protein and iron concentration.

346 Protein content in all selected fractions was analyzed by SDS-PAGE using 12 %  
347 acrylamide/bisacrylamide (37.5:1) gels and visualized by Coomassie Brilliant Blue  
348 staining (32). For immunoblot analysis, proteins were transferred to nitrocellulose  
349 membranes for 45 min at 20 V using a Transfer-Blot® Semi Dry system (Bio-Rad).  
350 Immunoblot analyses were carried out with antibodies raised against *A. vinelandii* NifQ  
351 (1:2,500 dilution), NifU (1:2,500 dilution) and NifS (1:1,500 dilution) (29). A horseradish  
352 peroxidase conjugated anti-rabbit antibody (Invitrogen) diluted 1:15,000 was used as a  
353 secondary antibody. Chemiluminescent detection was carried out according to Pierce  
354 ECL Western Blotting Substrate kit's instructions (ThermoFisher Scientific) and  
355 developed in an iBright FL1000 Imaging System (ThermoFisher Scientific).

356

### 357 ***Ultraviolet-visible spectroscopy***

358 UV-visible absorption spectra were collected under anaerobic conditions (< 0.1  
359 ppm O<sub>2</sub>) inside a glovebox (MBraun) in septum sealed-cuvettes to avoid the O<sub>2</sub>  
360 contamination during the measurements in the Shimadzu UV-2600 spectrophotometer.  
361 Absorption (225 nm to 800 nm) was recorded, and the data were normalized to absorption  
362 at 280 nm.

363

### 364 ***Statistical methods***

365 SPSS software (Statistical Package for Social Sciences) was used for statistical  
366 analyses. The data were compared using one way analyses of variance (ANOVA)  
367 followed by Bonferroni's multiple comparison test (p< 0.01).

368

### 369 ***Data Availability***

370 The authors declare that the data supporting the findings of this study are available  
371 within the article, its supplementary information and data, and upon request.

372

373

## 374 **Supporting Information**

375 This article contains supporting information.

376

## 377 **Acknowledgements**

378 The authors would like to acknowledge Dr. Isidro Abreu (CBGP, UPM-  
379 INIA/CSIC) for his help in the protein-protein interaction assays, Dr. Lucía Payá (CBGP,  
380 UPM-INIA/CSIC) for providing the PN2LP30 vector, and Dr. Dennis Dean and Ms.  
381 Valerie L. Cash (Virginia Tech) for their gift of the sNifQ, NifUs, and sNifS expressing  
382 plasmids.

383

## 384 **Funding and Additional Information**

385 This work was supported in part by the Bill & Melinda Gates Foundation (INV-  
386 005889). Under the grant conditions of the Foundation, a Creative Commons Attribution  
387 4.0 Generic License has already been assigned to the Author Accepted Manuscript  
388 version that might arise from this submission. EB was funded by the Severo Ochoa  
389 Programme for Centres of Excellence in R&D from Agencia Estatal de Investigación of  
390 Spain (grant SEV-2016-0672) received by Centro de Biotecnología y Genómica de  
391 Plantas (UPM-INIA/CSIC). XJ is recipient of a doctoral fellowship from Universidad  
392 Politécnica de Madrid.

393

## 394 **Conflict of Interest**

395 The authors declare that they have no conflict of interest with the contents of this  
396 article.

397

## 398 **Author contribution**

399 EB performed most of the experiments. XJ prepared the reconstituted NifU. EJV  
400 carried out the holo-NifQ purifications. EB, LMR and MGG designed experiments,  
401 analyzed data, and wrote the manuscript with input from the other authors.

402

## 403 **References**

- 404 1. Seefeldt, L. C., Yang, Z.-Y., Lukoyanov, D. A., Harris, D. F., Dean, D. R., Raugei,  
405 S., and Hoffman, B. M. (2020) Reduction of substrates by nitrogenases. *Chem.*  
406 *Rev.* **120**, 5082–5106

- 407 2. Bulen, W. A., and LeComte, J. R. (1966) The nitrogenase system from  
408 *Azotobacter*: two-enzyme requirement for N<sub>2</sub> reduction, ATP-dependent H<sub>2</sub>  
409 evolution, and ATP hydrolysis. *Proc. Natl. Acad. Sci. U. S. A.* **56**, 979–986
- 410 3. Einsle, O., Tezcan, F. A., Andrade, S. L. A., Schmid, B., Yoshida, M., Howard, J.  
411 B., and Rees, D. C. (2002) Nitrogenase MoFe-Protein at 1.16 Å resolution: A  
412 central ligand in the FeMo-cofactor. *Science*. **297**, 1696–1700
- 413 4. Spatzal, T., Aksoyoglu, M., Zhang, L., Andrade, S. L. A., Schleicher, E., Weber,  
414 S., Rees, D. C., and Einsle, O. (2011) Evidence for interstitial carbon in nitrogenase  
415 FeMo cofactor. *Science* **334**, 940
- 416 5. Burén, S., Jiménez-Vicente, E., Echavarrri-Erasun, C., and Rubio, L. M. (2020)  
417 Biosynthesis of Nitrogenase Cofactors. *Chem. Rev.* **120**, 4921–4968
- 418 6. Seefeldt, L. C., Peters, J. W., Beratan, D. N., Bothner, B., Minter, S. D., Raugei,  
419 S., and Hoffman, B. M. (2018) Control of electron transfer in nitrogenase. *Curr.*  
420 *Opin. Chem. Biol.* **47**, 54–59
- 421 7. Fu, W., Jack, R. F., Morgan, T. V, Dean, D. R., and Johnson, M. K. (1994) NifU  
422 gene product from *Azotobacter vinelandii* is a homodimer that contains two  
423 identical [2Fe-2S] clusters. *Biochemistry*. **33**, 13455–13463
- 424 8. Smith, A. D., Jameson, G. N. L., Dos Santos, P. C., Agar, J. N., Naik, S., Krebs,  
425 C., Frazzon, J., Dean, D. R., Huynh, B. H., and Johnson, M. K. (2005) NifS-  
426 mediated assembly of [4Fe-4S] clusters in the N- and C-terminal domains of the  
427 NifU scaffold protein. *Biochemistry*. **44**, 12955–12969
- 428 9. Zheng, L., White, R. H., Cash, V. L., Jack, R. F., and Dean, D. R. (1993) Cysteine  
429 desulfurase activity indicates a role for NIFS in metallocluster biosynthesis. *Proc.*  
430 *Natl. Acad. Sci. U.S.A.* **90**, 2754–2758
- 431 10. Dos Santos, P. C., Smith, A. D., Frazzon, J., Cash, V. L., Johnson, M. K., and  
432 Dean, D. R. (2004) Iron-Sulfur cluster assembly: NifU-directed activation of the  
433 nitrogenase Fe protein. *J. Biol. Chem.* **279**, 19705–19711
- 434 11. Zhao, D., Curatti, L., and Rubio, L. M. (2007) Evidence for NifU and NifS  
435 participation in the biosynthesis of the Iron-Molybdenum cofactor of nitrogenase.  
436 *J. Biol. Chem.* **282**, 37016–37025
- 437 12. Imperial, J., Ugalde, R. A., Shah, V. K., and Brill, W. J. (1984) Role of the *nifQ*

- 438 gene product in the incorporation of molybdenum into nitrogenase in *Klebsiella*  
439 *pneumoniae*. *J. Bacteriol.* **158**, 187–194
- 440 13. Rodríguez-Quiñones, F., Bosch, R., and Imperial, J. (1993) Expression of the  
441 *nifBfdxNnifOQ* region of *Azotobacter vinelandii* and its role in nitrogenase activity.  
442 *J. Bacteriol.* **175**, 2926–2935
- 443 14. Hernandez, J. A., Curatti, L., Aznar, C. P., Perova, Z., Britt, R. D., and Rubio, L.  
444 M. (2008) Metal trafficking for nitrogen fixation: NifQ donates molybdenum to  
445 NifEN/NifH for the biosynthesis of the nitrogenase FeMo-cofactor. *Proc. Nat.*  
446 *Acad. Sci. U.S.A.* **105**, 11679–11684
- 447 15. Masson-Boivin, C., Giraud, E., Perret, X., and Batut, J. (2009) Establishing  
448 nitrogen-fixing symbiosis with legumes: how many rhizobium recipes? *Trends*  
449 *Microbiol.* **17**, 458–466
- 450 16. George, S. J., Hernandez, J. A., Jimenez-Vicente, E., Echavarri-Erasun, C., and  
451 Rubio, L. M. (2016) EXAFS reveals two Mo environments in the nitrogenase iron–  
452 molybdenum cofactor biosynthetic protein NifQ. *Chem. Commun.* **52**, 11811–  
453 11814
- 454 17. Braymer, J. J., Freibert, S. A., Rakwalska-Bange, M., and Lill, R. (2021)  
455 Mechanistic concepts of iron-sulfur protein biogenesis in Biology. *Biochim.*  
456 *Biophys. Acta - Mol. Cell Res.* **1868**, 118863
- 457 18. Andreini, C., Rosato, A., and Banci, L. (2017) The relationship between  
458 environmental dioxygen and iron-sulfur proteins explored at the genome level.  
459 *PLoS One.* **12**, e0171279
- 460 19. Lill, R., and Freibert, S.-A. (2020) Mechanisms of mitochondrial iron-sulfur  
461 protein biogenesis. *Annu. Rev. Biochem.* **89**, 471–499
- 462 20. Winkel, B. S. J. (2004) Metabolic channeling in plants. *Annu. Rev. Plant Biol.* **55**,  
463 85–107
- 464 21. Arragain, S., Jiménez-Vicente, E., Scandurra, A. A., Burén, S., Rubio, L. M., and  
465 Echavarri-Erasun, C. (2017) Diversity and functional analysis of the FeMo-  
466 cofactor maturase NifB. *Front. Plant Sci.* **8**, 1947
- 467 22. González-Guerrero, M., and Argüello, J. M. (2008) Mechanism of Cu<sup>+</sup>-  
468 transporting ATPases: Soluble Cu<sup>+</sup>-chaperones directly transfer Cu<sup>+</sup> to



- 469 transmembrane transport sites. *Proc. Natl. Acad. Sci. U.S.A.* **105**, 5992–5997
- 470 23. Padilla-Benavides, T., McCann, C. J., and Argüello, J. M. (2013) The mechanism  
471 of Cu<sup>+</sup> transport ATPases: Interaction with Cu<sup>+</sup> chaperones and the role of transient  
472 metal-binding sites. *J. Biol. Chem.* **288**, 69–78
- 473 24. Yokoyama, K., and Leimkühler, S. (2015) The role of FeS clusters for  
474 molybdenum cofactor biosynthesis and molybdoenzymes in bacteria. *Biochim.*  
475 *Biophys. Acta - Mol. Cell Res.* **1853**, 1335–1349
- 476 25. Eseverri, Á., López-Torrejón, G., Jiang, X., Burén, S., Rubio, L. M., and Caro, E.  
477 (2020) Use of synthetic biology tools to optimize the production of active  
478 nitrogenase Fe protein in chloroplasts of tobacco leaf cells. *Plant Biotechnol. J.*  
479 **18**, 1882–1896
- 480 26. Burén, S., Pratt, K., Jiang, X., Guo, Y., Jiménez-Vicente, E., Echavarri-Erasun, C.,  
481 Dean, D. R., Saaem, I., Gordon, D. B., Voigt, C. A., and Rubio L. M. (2019)  
482 Biosynthesis of the nitrogenase active-site cofactor precursor NifB-co in  
483 *Saccharomyces cerevisiae*. *Proc. Natl. Acad. Sci. U. S. A.* **116**, 25078–25086
- 484 27. Koskela, E. V, and Frey, A. D. (2015) Homologous recombinatorial cloning  
485 without the creation of single-stranded ends: Exonuclease and ligation-  
486 independent cloning (ELIC). *Mol. Biotechnol.* **57**, 233–240
- 487 28. Lopez-Torrejón, G., Jimenez-Vicente, E., Buesa, J. M., Hernandez, J. A., Verma,  
488 H. K., and Rubio, L. M. (2016) Expression of a functional oxygen-labile  
489 nitrogenase component in the mitochondrial matrix of aerobically grown yeast.  
490 *Nat. Commun.* **7**, 11426
- 491 29. Smith, P. K., Krohn, R. I., Hermanson, G. T., Mallia, A. K., Gartner, F. H.,  
492 Provenzano, M. D., Fujimoto, E. K., Goeke, N. M., Olson, B. J., and Klenk, D. C.  
493 (1985) Measurement of protein using bicinchoninic acid. *Anal. Biochem.* **150**, 76–  
494 85
- 495 30. Fish, W. W. (1988) Rapid colorimetric micromethod for the quantitation of  
496 complexed iron in biological samples. *Methods Enzymol.* **158**, 357–364
- 497 31. Jiang, X., Payá-Tormo, L., Coroian, D., García-Rubio, I., Castellanos-Rueda, R.,  
498 Eseverri, Á., López-Torrejón, G., Burén, S., and Rubio, L. M. (2021) Exploiting  
499 genetic diversity and gene synthesis to identify superior nitrogenase NifH protein



500 variants to engineer N<sub>2</sub>-fixation in plants. *Commun. Biol.* **4**, 4

501 32. Laemmli, U. K. (1970) Cleavage of structural proteins during the assembly of the  
502 head of bacteriophage T4. *Nature*. **227**, 680–685

503

504

505

506

507

508

509

510

511

512

513

514

515

516

517

518

519

520

521

522

523

524

525

526

527

528

529

530

531

532

533 **Tables**

534 **Table 1. Proteins used in this work.** Data are the average iron content per protein  
535 monomer  $\pm$  SD calculated for apo-sNifQ (n=3), apo-NifQ<sub>H</sub> (n=8), holo-sNifQ (n=2), AS-  
536 <sub>H</sub>NifU (n=2), AS-NifU<sub>S</sub> (n=2), and R-NifU<sub>S</sub> (n=2). S indicates Strep-tagged protein; H,  
537 6xHis-tagged; AS, as isolated protein; and R, reconstituted [Fe-S] clusters.

| Protein | Name                  | Tag/ Position | Fe/ monomer     | Source    |
|---------|-----------------------|---------------|-----------------|-----------|
| NifQ    | apo-sNifQ             | Strep/ N-t    | 0.56 $\pm$ 0.01 | This work |
|         | apo-NifQ <sub>H</sub> | 6xHis/ C-t    | 0.04 $\pm$ 0.01 | This work |
|         | holo-sNifQ            | Strep/ N-t    | 2.82 $\pm$ 0.19 | This work |
| NifU    | AS- <sub>H</sub> NifU | 6xHis/ N-t    | 2.72 $\pm$ 0.46 | (28)      |
|         | AS-NifU <sub>S</sub>  | Strep/ C-t    | 2.38 $\pm$ 0.28 | This work |
|         | R-NifU <sub>S</sub>   | Strep/ C-t    | 5.82 $\pm$ 0.62 | This work |
| NifS    | sNifS                 | Strep/ N-t    | -               | This work |

538

539

540

541

542

543

544

545

546

547

548

549

550

551

552

553

554

555

556

557

558

559

560 **Figure Legends**

561 **Figure 1. NifU and NifS copurify with  $\text{sNifQ}$  from *E. coli* extracts expressing *nifQ*,**  
562 ***nifU*, and *nifS*.** Top panel shows the Coomassie staining of an SDS-PAGE of cell free  
563 extract (CFE), flowthrough (FT), wash (W1-W6) and elution (E1-E3) fractions of the  
564 extracts passed through a Streptactin column. The remaining panels show immunoblots  
565 of the same fractions developed with anti-NifQ, anti-NifU, or anti-NifS antibodies.  
566 Images show a representative assay (n=2). Uncropped immunoblots and gels are shown  
567 in Supplementary Fig. 4.

568

569 **Figure 2. AS-NifU<sub>S</sub> interacts with apo-NifQ<sub>H</sub>.** Top panel shows the Coomassie staining  
570 of an SDS-PAGE of flowthrough (FT), wash (W1-W12) and elution (E1-E2) fractions of  
571 a mixture solution containing AS-NifU<sub>S</sub>,  $\text{sNifS}$ , and apo-NifQ<sub>H</sub> passed through a Ni<sup>2+</sup>  
572 column. The remaining panels are the immunoblots of the same fractions developed with  
573 anti-NifQ, anti-NifU, or anti-NifS antibodies. Images show a representative assay (n=3).  
574 Uncropped immunoblots and gels are shown in Supplementary Fig. 5.

575

576 **Figure 3. AS-<sub>H</sub>NifU does not co-elute with holo- $\text{sNifQ}$ .** Top panel shows the Coomassie  
577 staining of an SDS-PAGE of AS-<sub>H</sub>NifU pull-down assay using holo- $\text{sNifQ}$  as bait. FT1  
578 represents flow-through fraction obtained after loading holo- $\text{sNifQ}$  onto the column. W2  
579 represents the second wash fraction. FT2 represents flow-through fraction obtained after  
580 loading AS-<sub>H</sub>NifU onto the column. W3 represents the third wash fraction after passing  
581 AS-<sub>H</sub>NifU over holo- $\text{sNifQ}$ - charged column. E1, 2, 3, 4 and 5 represent elution fractions.  
582 (n=4). Uncropped immunoblots and gels are shown in Supplementary Fig. 6.

583

584 **Figure 4. NifU<sub>S</sub> transfers iron to apo-NifQ<sub>H</sub>.** **A.** Top panel shows the Coomassie  
585 staining of an SDS-PAGE of flowthrough (FT), wash (W1-W12) and elution (E1-E2)  
586 fractions of a mixture solution containing AS-NifU<sub>S</sub> and apo-NifQ<sub>H</sub> passed through a Ni<sup>2+</sup>  
587 column. The remaining panels are the immunoblots of the same fractions developed with  
588 anti-NifQ or an anti-NifU antibodies. **B.** Top panel shows the Coomassie staining of an  
589 SDS-PAGE of flowthrough (FT), wash (W1-W12) and elution (E1-E2) fractions of a  
590 mixture solution containing R-NifU<sub>S</sub>, and apo-NifQ<sub>H</sub> passed through a Ni<sup>2+</sup> column. The  
591 remaining panels are the immunoblots of the same fractions developed with anti-NifQ or

592 an anti-NifU antibodies. Uncropped immunoblots and gels are shown in Supplementary  
593 Fig. 7. C. Iron content per monomer of pure isolated proteins, and in the FT and E1  
594 fractions obtained from a passing through a Ni<sup>2+</sup>-column a solution in which apo-NifQ<sub>H</sub>  
595 was incubated for 5 min with either AS-NifU<sub>S</sub> or R-NifU<sub>S</sub>. Bars represent the average ±  
596 SD (n=2). Different letters indicate statistically significant differences (p < 0.01).

597

598 **Figure 5. NifQ requires physical interaction from NifU to receive iron.** Iron content  
599 per monomer of pure isolated proteins or from proteins separated by a 2-kDa pore-size  
600 cutoff dialysis membrane after 5 or 120 min incubation. Bars represent the average ± SD  
601 (n=2). Different letters indicate statistically significant differences (p < 0.01).

602

603 **Figure 6. NifQ receives a [Fe<sub>4</sub>-S<sub>4</sub>] cluster from NifU.** A. UV- vis spectra of pure  
604 proteins. B. UV- vis spectra of E1 elution after the apo-NifQ<sub>H</sub>/R-NifU<sub>S</sub> interaction for 5  
605 min. The absorbances were normalized at 280 value (n=3).

606

607 **Figure S1. NifU and NifS do not bind to the Streptactin resin.** Top panel shows the  
608 Coomassie staining of an SDS-PAGE of cell free extract (CFE), flowthrough (FT), wash  
609 (W1-W6) and elution (E1-E3) fractions of *nifU* and *nifS*-expressing *E. coli* extracts  
610 passed through a Streptactin column. The remaining panels are the immunoblots of the  
611 same fractions developed with anti-NifU or an anti-NifS antibodies. Images show a  
612 representative assay (n=2). Uncropped immunoblots and gels are shown in  
613 Supplementary Fig. 8.

614

615 **Figure S2. AS-NifU<sub>S</sub> and <sub>S</sub>NifS proteins do not bind to a Ni<sup>2+</sup> column.** Top panel  
616 shows the Coomassie staining of an SDS-PAGE of flowthrough (FT), wash (W1-W12)  
617 and elution (E1-E2) fractions of a mixture solution containing AS-NifU<sub>S</sub> and <sub>S</sub>NifS  
618 passed through a Ni<sup>2+</sup> column. The remaining panels are the immunoblots of the same  
619 fractions developed with anti-NifU or an anti-NifS antibodies. Images show a  
620 representative assay (n=3). Uncropped immunoblots and gels are shown in  
621 Supplementary Fig. 9.

622

623 **Figure S3. NifU<sub>S</sub> transfers iron to apo-NifQ<sub>H</sub>.** A. Top panel shows the Coomassie  
624 staining of an SDS-PAGE of flowthrough (FT), wash (W1-W12) and elution (E1-E2)

625 fractions of a mixture solution containing AS-NifU<sub>S</sub> and apo-NifQ<sub>H</sub> passed through a Ni<sup>2+</sup>  
626 column. The remaining panels are the immunoblots of the same fractions developed with  
627 anti-NifQ or an anti-NifU antibodies. **B.** Top panel shows the Coomassie staining of an  
628 SDS-PAGE of flowthrough (FT), wash (W1-W12) and elution (E1-E2) fractions of a  
629 solution mixture containing R-NifU<sub>S</sub> and apo-NifQ<sub>H</sub> passed through a Ni<sup>2+</sup> column. The  
630 remaining panels are the immunoblots of the same fractions developed with anti-NifQ or  
631 an anti-NifU antibodies. Uncropped immunoblots and gels are shown in Supplementary  
632 Fig. 10. **C.** Iron content per monomer of pure isolated protein, and in the FT and E1  
633 fractions obtained from a passing through a Ni<sup>2+</sup>-column a solution in which apo-NifQ<sub>H</sub>  
634 was incubated for 120 min with either AS-NifU<sub>S</sub> or R-NifU<sub>S</sub>. Bars represent the average  
635 ± SD (n=2). Different letters indicate statistically significant differences (p < 0.01).

636

637 **Figure S4:** Uncropped Coomassie-stained gels shown in Figure 1 (A). Uncropped  
638 immunoblots shown in Figure 1 that correspond to immunoblotting with an anti-NifQ  
639 antibody (B), an anti-NifU antibody (C) or an anti-NifS antibody (D).

640

641 **Figure S5:** Uncropped Coomassie-stained gels shown in Figure 2 (A). Uncropped  
642 immunoblots shown in Figure 2 that correspond to immunoblotting with an anti-NifQ  
643 (B), an anti-NifU (C), or an anti-NifS (D) antibodies.

644

645 **Figure S6:** Uncropped Coomassie-stained gels shown in Figure 3 (A). Uncropped  
646 immunoblots shown in Figure 3 that correspond immunoblotting with an anti-NifQ (B),  
647 or an anti-NifU (C) antibodies.

648

649 **Figure S7:** Uncropped Coomassie-stained gels shown in Figure 4A (A). Uncropped  
650 immunoblots shown in Figure 4A that correspond immunoblotting with an anti-NifQ (B),  
651 or an anti-NifU (C) antibodies. Uncropped Coomassie shown in Figure 4B (D).  
652 Uncropped immunoblots shown in Figure 4B that correspond immunoblotting with an  
653 anti-NifQ (E), or an anti-NifU (F) antibodies.

654

655 **Figure S8:** Uncropped Coomassie-stained gels shown in Figure S1 (A). Uncropped  
656 immunoblots shown in Figure S1 that correspond immunoblotting with an anti-NifU (B),  
657 or an anti-NifS (C) antibodies.

658

659 **Figure S9:** Uncropped Coomassie-stained gels shown in Figure S2 (A). Uncropped  
660 immunoblots shown in Figure S2 that correspond immunoblotting with an anti-NifU (B),  
661 or an anti-NifS (C) antibodies.

662

663 **Figure S10:** Uncropped Coomassie-stained gels shown in Figure S3A (A). Uncropped  
664 immunoblots shown in Figure S3A that correspond immunoblotting with an anti-NifQ  
665 (B), or an anti-NifU (C) antibodies. Uncropped Coomassie shown in Figure S3B (D).  
666 Uncropped immunoblots shown in Figure S3B that correspond immunoblotting with an  
667 anti-NifQ (E), or an anti-NifU (F) antibodies.

668

669 **Table S1:** Primers used in this study.

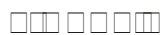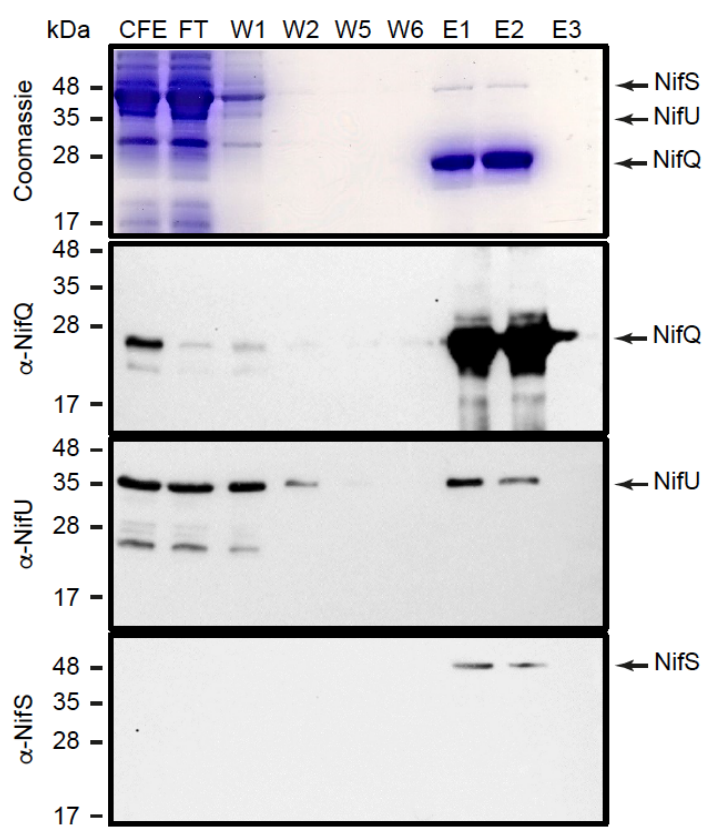



□□□□□2

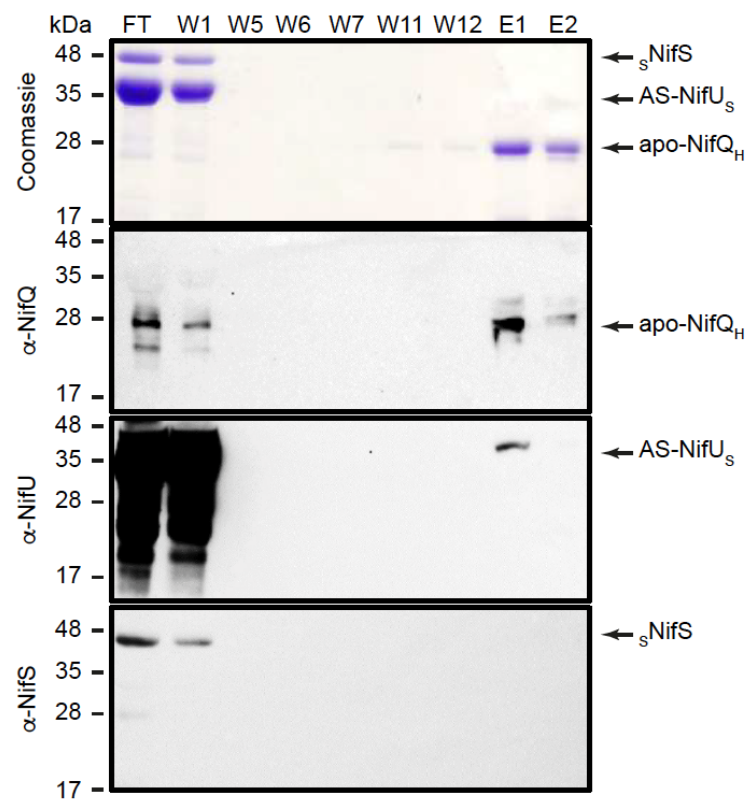

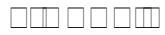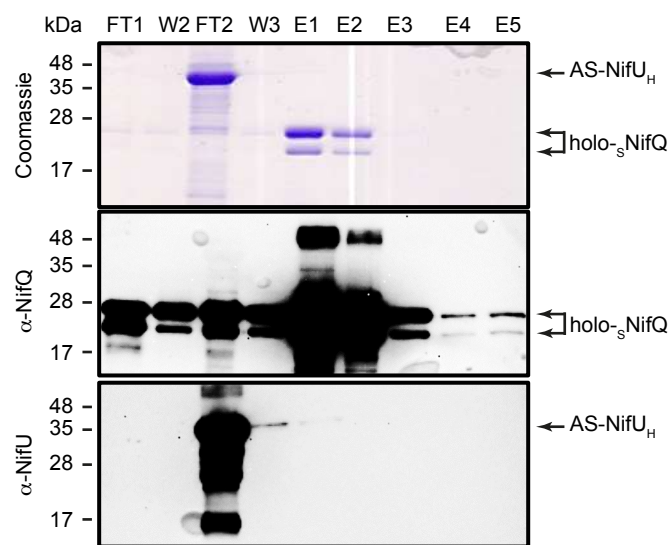

**FIGURE 4**

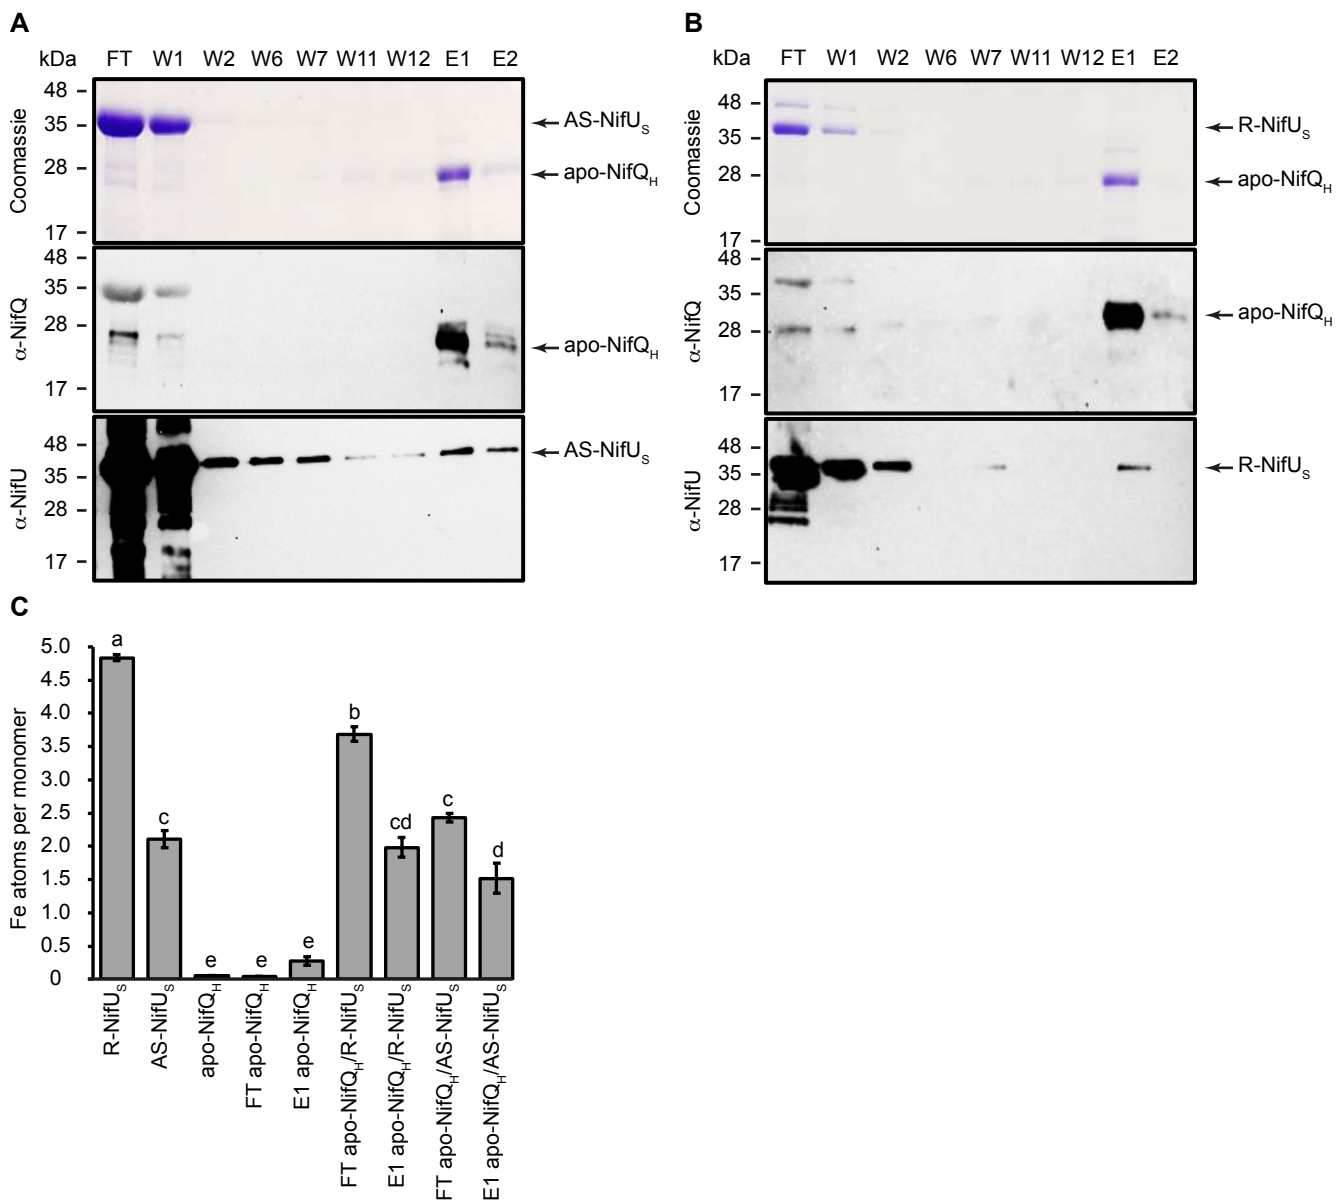

**FIGURE 5**

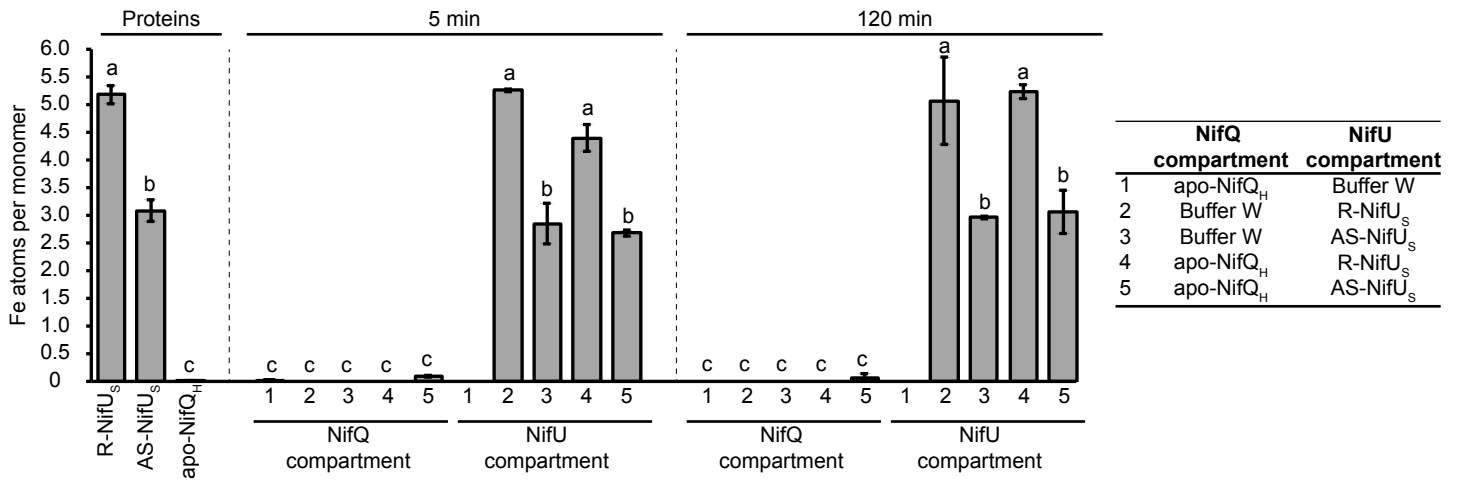

**FIGURE 6**

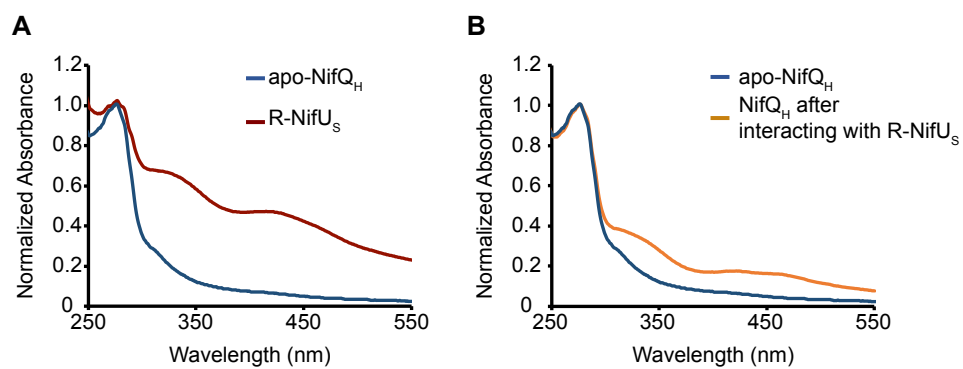

Source: https://www.biorxiv.org/content/10.1101/2021.12.06.471366v1.full.pdf
